# Supplementary material
Source: PubMed Central journal article supplement (PMC5523142)
Supplement: NIHMS878175-supplement-SI.pdf [file NIHMS878175-supplement-SI.pdf]

# Supporting Information for ‘Molecular Transport Through a Graphene Nanopore Capacitor’

Manish Shankla<sup>\*,†</sup> and Aleksei Aksimentiev<sup>\*,‡,¶</sup>

*Center for Biophysics and Computational Biology, University of Illinois at Urbana–Champaign, Department of Physics, and Beckman Institute for Advanced Science and Technology,*

*University of Illinois at Urbana–Champaign, Urbana, IL*

E-mail: shankla2@illinois.edu; aksiment@illinois.edu

---

\*To whom correspondence should be addressed

†Center for Biophysics and Computational Biology, University of Illinois at Urbana–Champaign

‡Department of Physics

¶Beckman Institute for Advanced Science and Technology

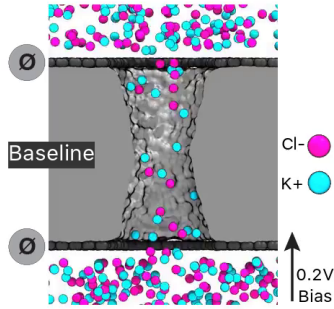

Animation S1: Ion transport through a baseline (uncharged) graphene nanopore capacitor with an applied transmembrane bias of 200 mV. The nanopore capacitor is shown in a cut-away representation, dark grey spheres represent carbon atoms comprising the graphene plates, a light gray surface represents the silica membrane, and purple and light blue spheres represent  $\text{Cl}^-$  and  $\text{K}^+$  ions, respectively. The top and bottom graphene layers are electrically neutral ( $\sigma_{\text{top}} = \sigma_{\text{bottom}} = 0 \text{ e nm}^{-2}$ ), which is schematically indicated by the dark grey circles. This animation shows the last 5 ns of the respective 25 ns MD trajectory.

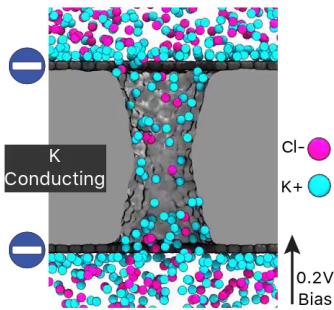

Animation S2: Ion transport through a  $\text{K}^+$  conducting graphene nanopore capacitor with an applied transmembrane bias of 200 mV. The nanopore capacitor is shown in a cut-away representation, dark grey spheres represent carbon atoms comprising the graphene plates, a light gray surface represents the silica membrane, and purple and light blue spheres represent  $\text{Cl}^-$  and  $\text{K}^+$  ions, respectively. The top and bottom graphene plates are negatively charged to  $\sigma_{\text{bottom}} = \sigma_{\text{top}} = -2.0 \text{ e nm}^{-2}$  which is schematically illustrated by the blue circles. This animation shows the last 5 ns of the respective 25 ns MD trajectory.

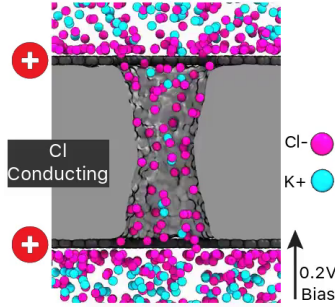

Animation S3: Ion transport through a  $\text{Cl}^-$  conducting graphene nanopore capacitor with an applied transmembrane bias of 200 mV. The nanopore capacitor is shown in a cut-away representation, dark grey spheres represent carbon atoms comprising the graphene plates, a light gray surface represents the silica membrane, and purple and light blue spheres represent  $\text{Cl}^-$  and  $\text{K}^+$  ions, respectively. The top and bottom graphene plates are positively charged to  $\sigma_{\text{bottom}} = \sigma_{\text{top}} = -2.0 \text{ e nm}^{-2}$  which is schematically illustrated by the red circles. This animation shows the last 5 ns of the respective 25 ns MD trajectory.

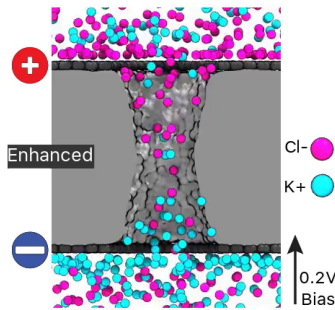

Animation S4: Ion transport through an enhanced graphene nanopore capacitor with an applied transmembrane bias of 200 mV. The nanopore capacitor is shown in a cut-away representation, dark grey spheres represent carbon atoms comprising the graphene plates, a light gray surface represents the silica membrane, and purple and light blue spheres represent  $\text{Cl}^-$  and  $\text{K}^+$  ions, respectively. The top and bottom graphene plates are oppositely charged:  $\sigma_{\text{top}} = +2.0 \text{ e nm}^{-2}$  and  $\sigma_{\text{bottom}} = -2.0 \text{ e nm}^{-2}$  which is illustrated by the red and blue circles. This animation shows the last 5 ns of the respective 25 ns MD trajectory.

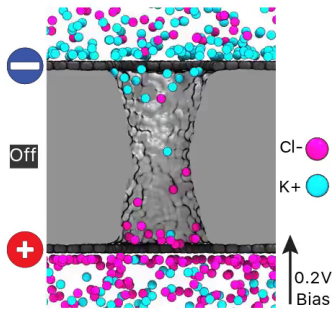

Animation S5: Ion transport through an off-state graphene nanopore capacitor with an applied transmembrane bias of 200 mV. The nanopore capacitor is shown in a cut-away representation, dark grey spheres represent carbon atoms comprising the graphene plates, a light gray surface represents the silica membrane, and purple and light blue spheres represent  $\text{Cl}^-$  and  $\text{K}^+$  ions, respectively. The top and bottom graphene plates are oppositely charged:  $\sigma_{\text{top}} = -2.0 \text{ e nm}^{-2}$  and  $\sigma_{\text{bottom}} = 2.0 \text{ e nm}^{-2}$  which is illustrated by the blue and red circles. This animation shows the last 5 ns of the respective 25 ns MD trajectory.
